# Supplementary material for: Identifying the Cause of Toxicity of a Saline Mine Water
Source: PubMed Central journal article supplement (PMC4152331; doi:10.1371/journal.pone.0106857), 2014-09-02
Supplement: pone.0106857.s001.pdf [file pone.0106857.s001.pdf]

**A - MCW**

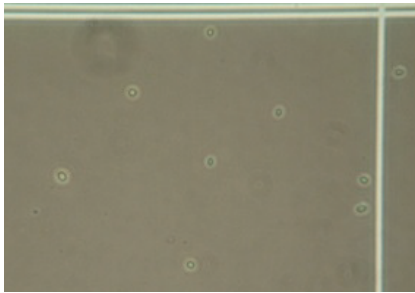

**B - SS**

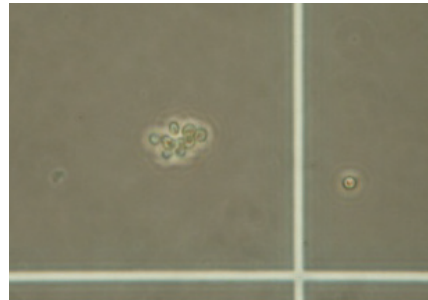

**C - SS (+ Br, Mn, Sr)**

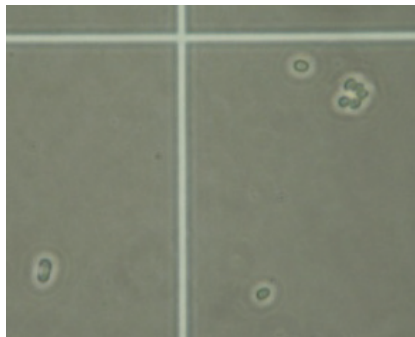

**D - MS**

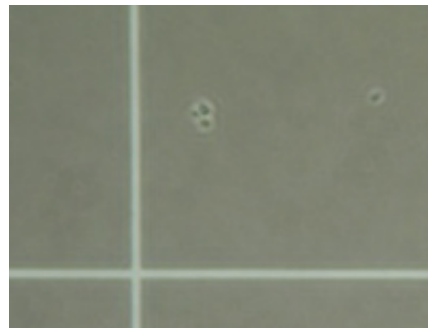

**Figure S1** Images showing various morphological changes, notably aggregations in B and C, occurring to the *Chlorella* sp. cells in different water types (>400× magnification). A – Magela Creek Water (MCW); B – Synthetic Seepage (SS); C; Synthetic Seepage with Br, Mn and Sr added (SS (+ Br, Mn, Sr)); and D – Mine Seepage (MS).
