# Supplementary material for: Identifying the Cause of Toxicity of a Saline Mine Water
Source: PubMed Central journal article supplement (PMC4152331; doi:10.1371/journal.pone.0106857), 2014-09-02
Supplement: pone.0106857.s002.pdf [file pone.0106857.s002.pdf]

a) Magela Creek Water Control

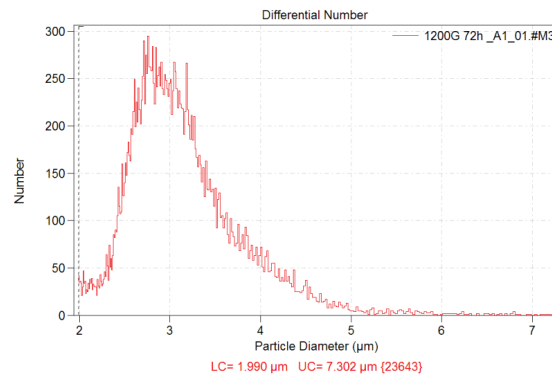

b) 100% Synthetic Seepage

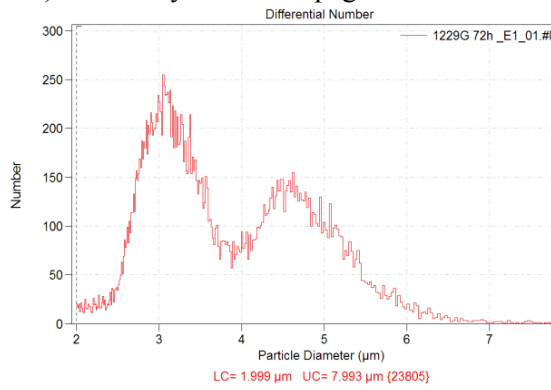

c) 100% Mine Seepage

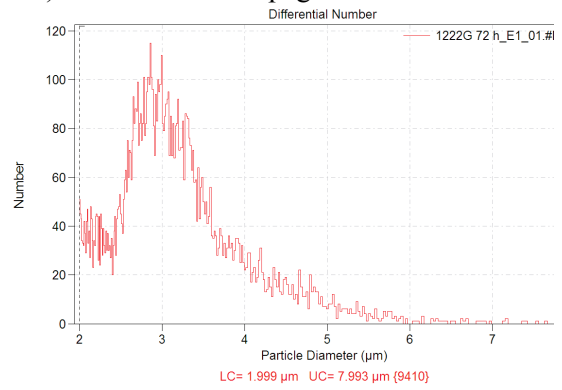

**Figure S2** Examples of electronic particle counter histograms for *Chlorella* sp. exposed to a) Control b) Synthetic Seepage c) Mine Seepage for 72 hours.
