# Supplementary material for: Identifying the Cause of Toxicity of a Saline Mine Water
Source: PubMed Central journal article supplement (PMC4152331; doi:10.1371/journal.pone.0106857), 2014-09-02
Supplement: pone.0106857.s003.pdf [file pone.0106857.s003.pdf]

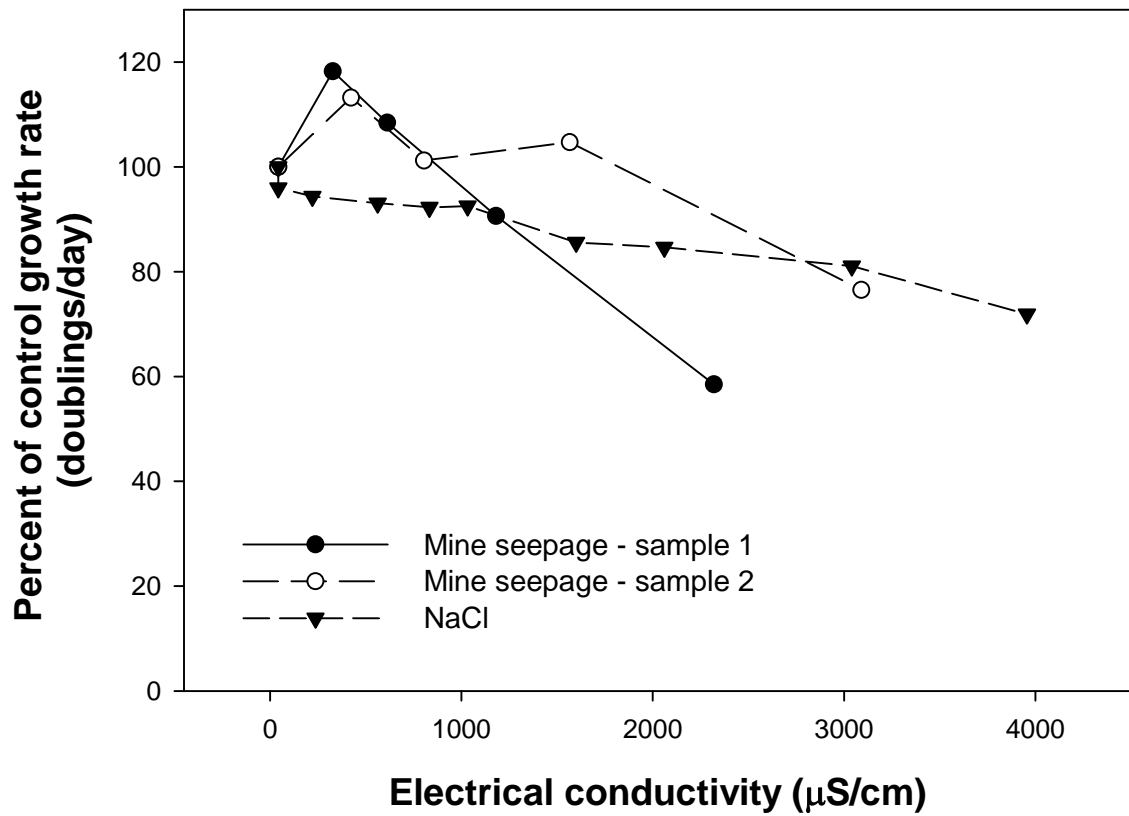

**Figure S3** Response of *Chlorella* sp. growth rate to Mine seepage (samples 1 and 2) and NaCl, with concentrations expressed as Electrical Conductivity.
