# Supplementary material for: Identifying the Cause of Toxicity of a Saline Mine Water
Source: PubMed Central journal article supplement (PMC4152331; doi:10.1371/journal.pone.0106857), 2014-09-02
Supplement: pone.0106857.s004.pdf [file pone.0106857.s004.pdf]

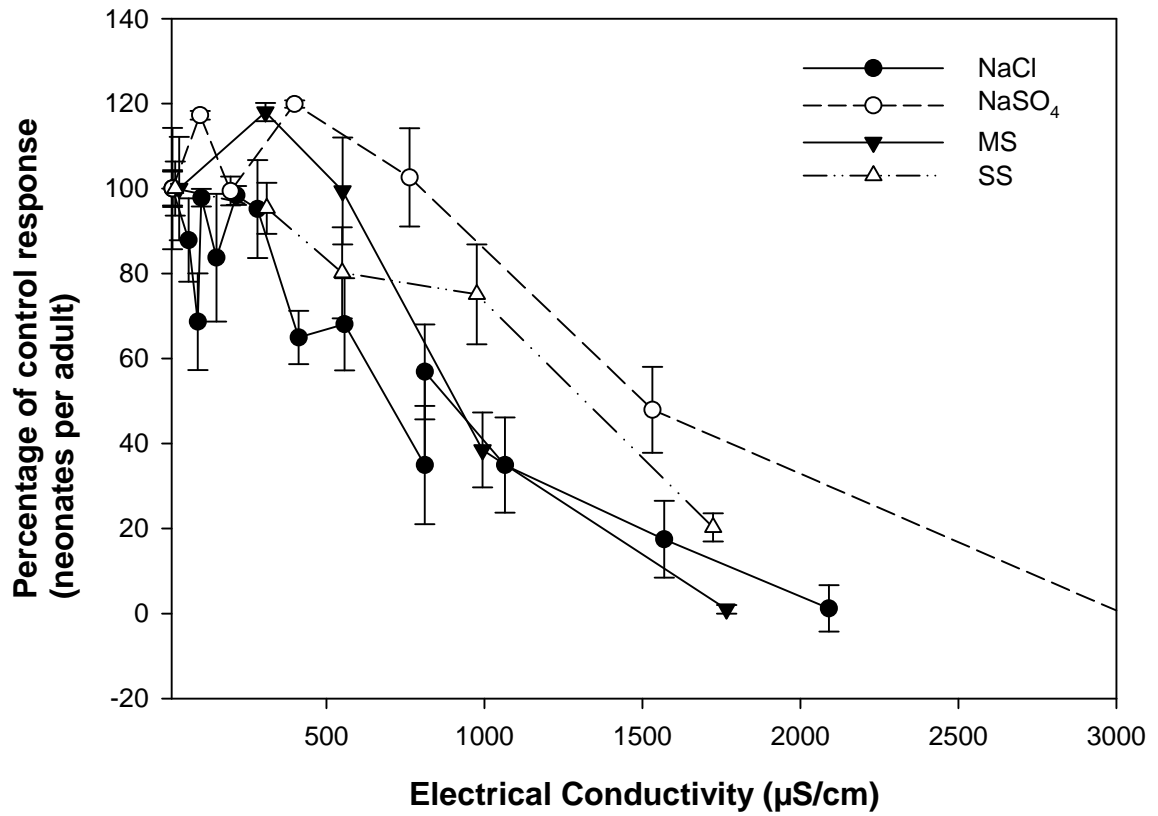

**Figure S4** Comparison of *M. macleayi* concentration-response relationships for Mine Seepage (MS), Synthetic Seepage (SS), sodium sulfate (NaSO<sub>4</sub>) and sodium chloride (NaCl), with concentrations expressed as Electrical Conductivity.
